# Supplementary material for: Manifestation of dissimilar types of magnetism in iron- and chromium-substituted Mn2SnS4
Source: Royal Society of Chemistry journal article supplement (doi:10.1039/d1dt02509k), 2021-01-01
Supplement: d1dt02509k1.pdf [file d1dt02509k1.pdf]

Supporting Information

**Manifestation of Dissimilar Types of Magnetism in Iron and  
Chromium Substituted  $Mn_2SnS_4$**

Tuhin Subhra Dash<sup>a</sup>, Subham Naik<sup>a</sup>, Sheetal<sup>d</sup>, Sachindra Nath Sarangi<sup>b</sup>, Debakanta Samal<sup>b,c</sup>,  
C. S. Yadav<sup>d</sup>, S. D. Kaushik<sup>e</sup> and Saroj L. Samal<sup>a,\*</sup>

<sup>a</sup>Solid State and Materials Laboratory, Department of Chemistry, National Institute of  
Technology, Rourkela-769008, INDIA

<sup>b</sup>Institute of Physics, Bhubaneswar-751005, INDIA

<sup>c</sup>Homi Bhabha National Institute, Anushakti Nagar, Mumbai 400085, INDIA

<sup>d</sup>School of Basic Sciences, Indian Institute of Technology Mandi, Mandi-175005 (H.P.),  
INDIA

<sup>e</sup>UGC-DAE Consortium for Scientific Research, Mumbai Centre, BARC, Maharashtra-  
400085, INDIA

**Table S1:** Weight of the elements used for synthesis of Fe substituted Mn<sub>2</sub>SnS<sub>4</sub> compounds.

| Fe content (%) | Weight of the elements |                  |                  |                 |
|----------------|------------------------|------------------|------------------|-----------------|
|                | Weight of Mn (g)       | Weight of Fe (g) | Weight of Sn (g) | Weight of S (g) |
| 3              | 0.0886                 | 0.0028           | 0.0987           | 0.1099          |
| 6              | 0.0859                 | 0.0056           | 0.0987           | 0.1099          |
| 9              | 0.0831                 | 0.0084           | 0.0987           | 0.1098          |

**Table S2:** Weight of the elements used for synthesis of Cr substituted Mn<sub>2</sub>SnS<sub>4</sub> compounds.

| Cr content (%) | Weight of the elements |                  |                  |                 |
|----------------|------------------------|------------------|------------------|-----------------|
|                | Weight of Mn (g)       | Weight of Cr (g) | Weight of Sn (g) | Weight of S (g) |
| 4              | 0.0878                 | 0.0035           | 0.0988           | 0.1100          |
| 8              | 0.0842                 | 0.0069           | 0.0989           | 0.1100          |
| 10             | 0.0824                 | 0.0087           | 0.0989           | 0.1100          |
| 15             | 0.0779                 | 0.0130           | 0.0990           | 0.1101          |

**Table S3.** PXRD Refinement Table for Fe and Cr substituted compounds

| Fe content | 3%        | 6%        | 9%        |
|------------|-----------|-----------|-----------|
| a (Å)      | 7.4191(9) | 7.3935(9) | 7.4110(7) |
| b (Å)      | 10.474(1) | 10.464(1) | 10.473(1) |
| c (Å)      | 3.6640(5) | 3.6598(5) | 3.6631(4) |
| $\chi^2$   | 1.07      | 1.07      | 1.01      |
| Rp         | 7.35      | 7.30      | 6.83      |
| Rwp        | 9.61      | 9.27      | 8.75      |
| Rexp       | 9.26      | 8.96      | 8.73      |

| Cr content | 4%        | 8%        | 10%       | 15%       |
|------------|-----------|-----------|-----------|-----------|
| a (Å)      | 7.400(2)  | 7.417(1)  | 7.326(1)  | 7.398(1)  |
| b (Å)      | 10.461(2) | 10.474(2) | 10.426(2) | 10.467(2) |
| c (Å)      | 3.6674(9) | 3.6642(6) | 3.6691(7) | 3.6595(6) |
| $\chi^2$   | 1.08      | 1.04      | 1.52      | 1.19      |
| Rp         | 7.06      | 6.17      | 6.29      | 7.08      |
| Rwp        | 9.15      | 7.97      | 8.37      | 9.02      |
| Rexp       | 8.79      | 7.83      | 6.78      | 8.27      |

**Table S4.** Curie constant, Weiss constant and experimental average effective magnetic moment of Fe and Cr substituted compounds calculated from inverse susceptibility plot along with theoretical effective magnetic moment per magnetic ion.

| Compound Formula                                       | Weiss constant ( $\theta$ ) K | Curie constant (C) | Average effective magnetic moment ( $\mu_B$ ) per magnetic ion | Theoretical effective magnetic moment ( $\mu_B$ ) per magnetic ion |
|--------------------------------------------------------|-------------------------------|--------------------|----------------------------------------------------------------|--------------------------------------------------------------------|
| Mn <sub>1.94</sub> Fe <sub>0.06</sub> SnS <sub>4</sub> | -445                          | 10.42              | 6.46                                                           | 5.92                                                               |
| Mn <sub>1.88</sub> Fe <sub>0.12</sub> SnS <sub>4</sub> | -478                          | 8.50               | 5.83                                                           | 5.92                                                               |
| Mn <sub>1.82</sub> Fe <sub>0.18</sub> SnS <sub>4</sub> | -509                          | 8.34               | 5.78                                                           | 5.92                                                               |
| Mn <sub>1.92</sub> Cr <sub>0.08</sub> SnS <sub>4</sub> | -552                          | 11.22              | 6.70                                                           | 5.85                                                               |
| Mn <sub>1.84</sub> Cr <sub>0.16</sub> SnS <sub>4</sub> | -592                          | 13.35              | 7.31                                                           | 5.78                                                               |
| Mn <sub>1.80</sub> Cr <sub>0.20</sub> SnS <sub>4</sub> | -589                          | 10.67              | 6.53                                                           | 5.75                                                               |
| Mn <sub>1.70</sub> Cr <sub>0.30</sub> SnS <sub>4</sub> | -587                          | 9.83               | 6.27                                                           | 5.66                                                               |

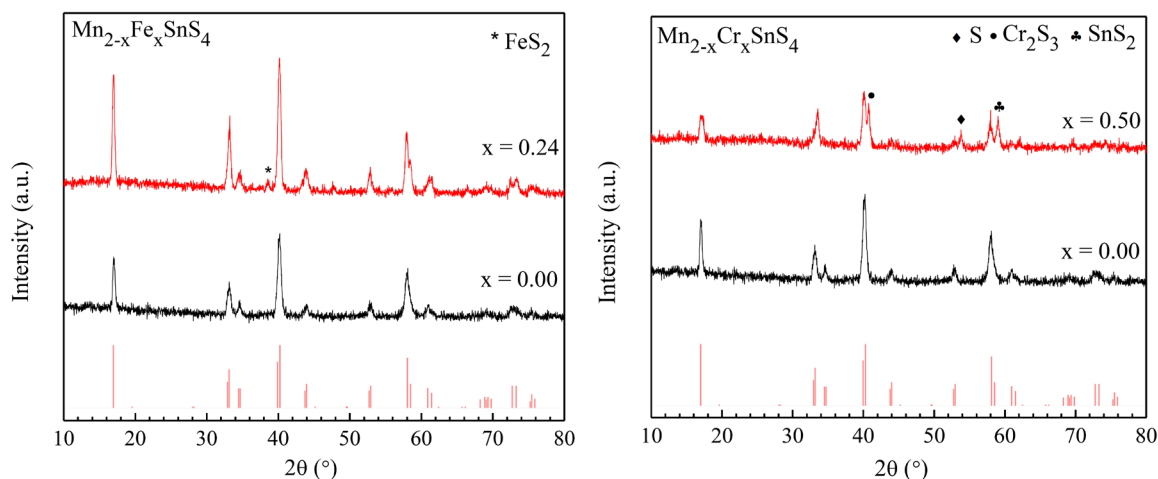

**Figure S1:** PXRD analysis of trial reaction of Mn<sub>2-x</sub>Fe<sub>x</sub>SnS<sub>4</sub> ( $x = 0.24$ ) i.e., 12% Fe-doping and Mn<sub>2-x</sub>Cr<sub>x</sub>SnS<sub>4</sub> ( $x = 0.50$ ) i.e., 25% Cr-doping. The reference pattern (Mn<sub>2</sub>SnS<sub>4</sub>) is 73-0829. Different symbols are used for denoting impurity phases.

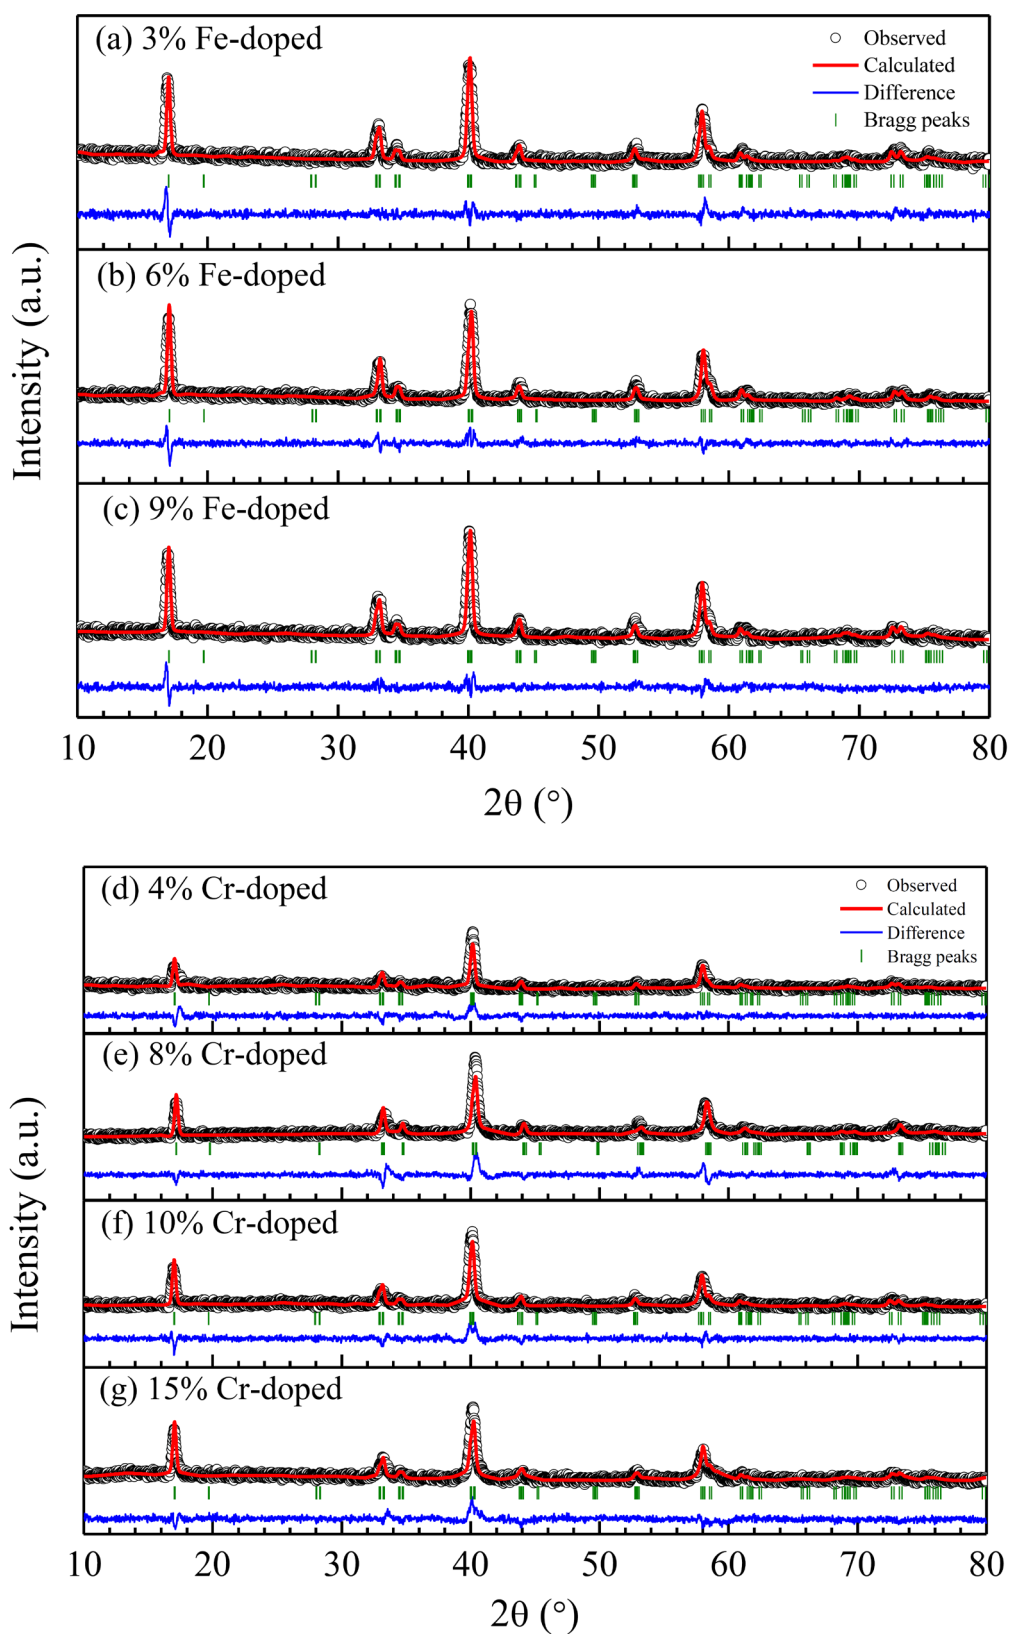

**Figure S2.** Rietveld refinement of powder X-ray diffraction data of (a) 3% Fe-doped  $\text{Mn}_2\text{SnS}_4$ , (b) 6% Fe-doped  $\text{Mn}_2\text{SnS}_4$ , (c) 9% Fe-doped  $\text{Mn}_2\text{SnS}_4$ , (d) 4% Cr-doped  $\text{Mn}_2\text{SnS}_4$ , (e) 8% Cr-doped  $\text{Mn}_2\text{SnS}_4$ , (f) 10% Cr-doped  $\text{Mn}_2\text{SnS}_4$ , and (g) 15% Cr-doped  $\text{Mn}_2\text{SnS}_4$ .

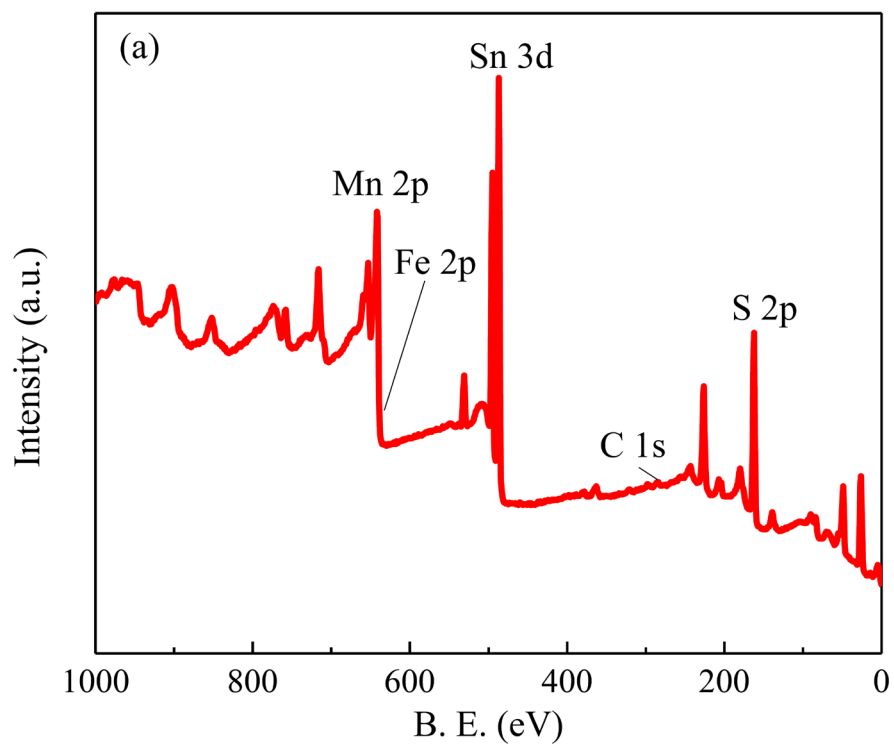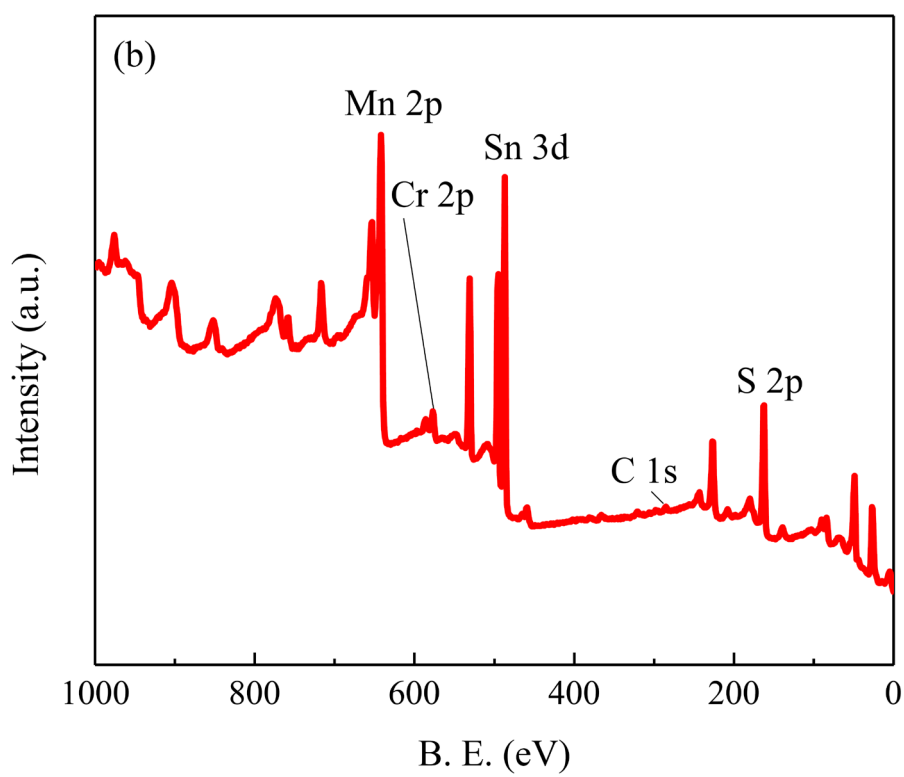

**Figure S3.** XPS survey scans (a)  $\text{Mn}_{1.82}\text{Fe}_{0.18}\text{SnS}_4$  and (b)  $\text{Mn}_{1.80}\text{Cr}_{0.20}\text{SnS}_4$

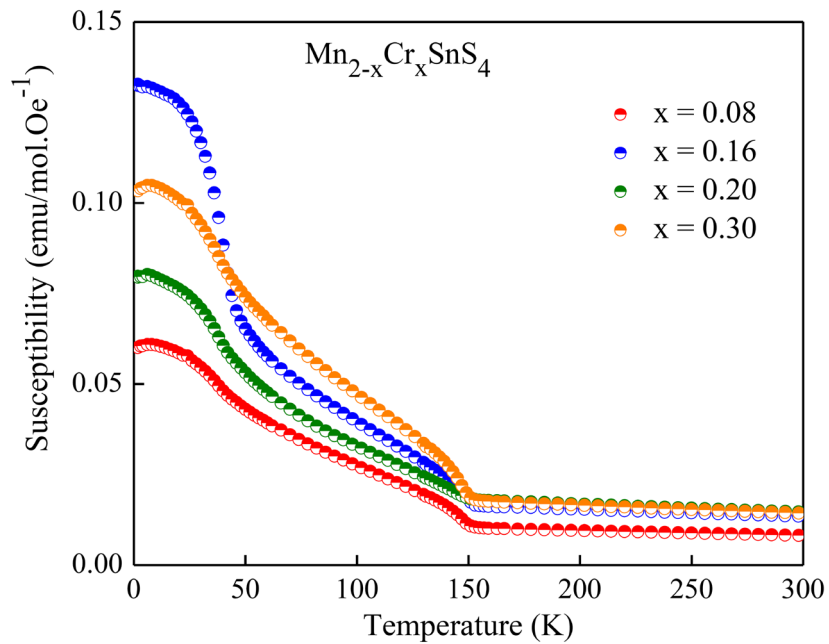

**Figure S4.** Molar susceptibility vs temperature plot of  $Mn_{2-x}Cr_xSnS_4$  ( $x = 0.08, 0.16, 0.20$  and  $0.30$ ) at 5000 Oe.

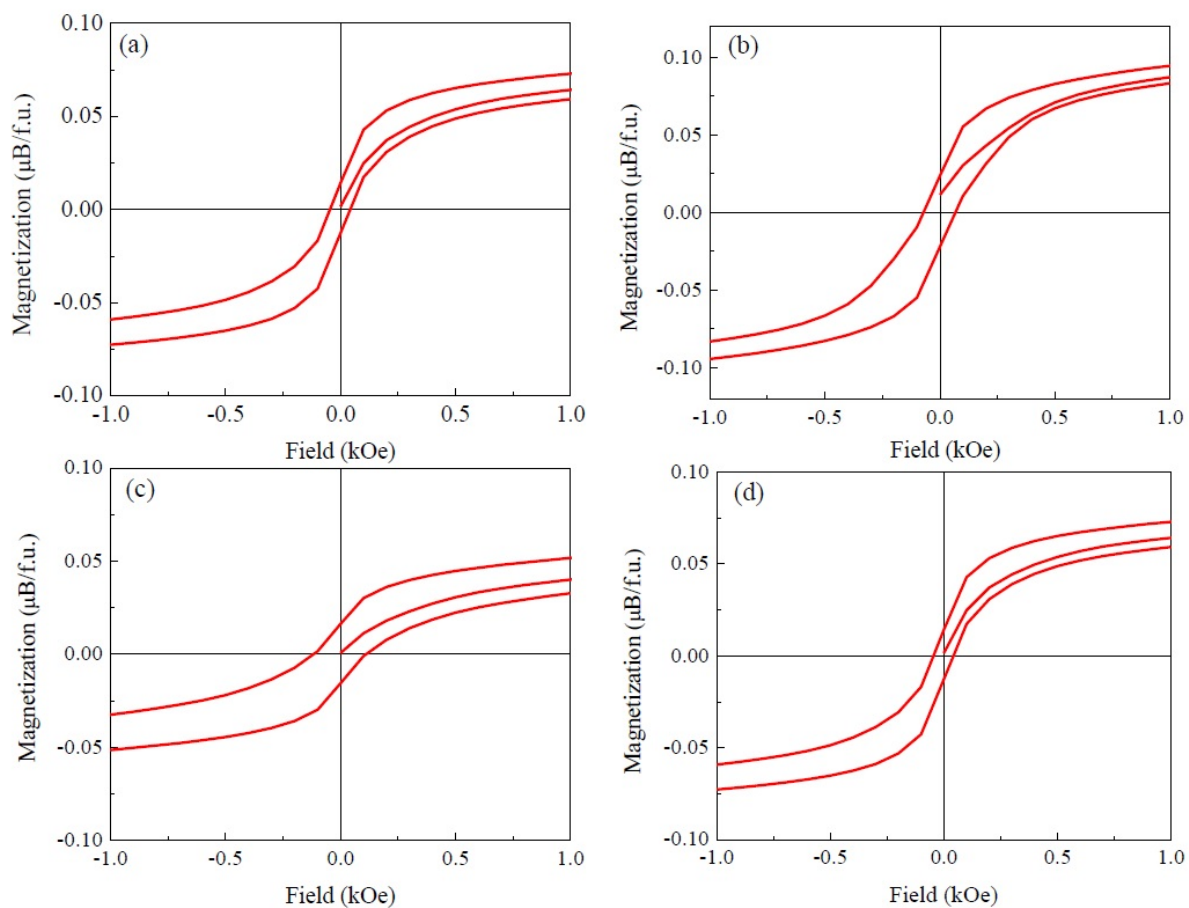

**Figure S5.** Hysteresis loop in isothermal magnetization ( $M$ ) versus applied magnetic field ( $H$ ) data of  $\text{Mn}_{2-x}\text{Cr}_x\text{SnS}_4$  at 5 K (a) for  $x = 0.08$ , (b)  $x = 0.16$  and (c) for  $x = 0.20$  and (d) for  $x = 0.30$ .

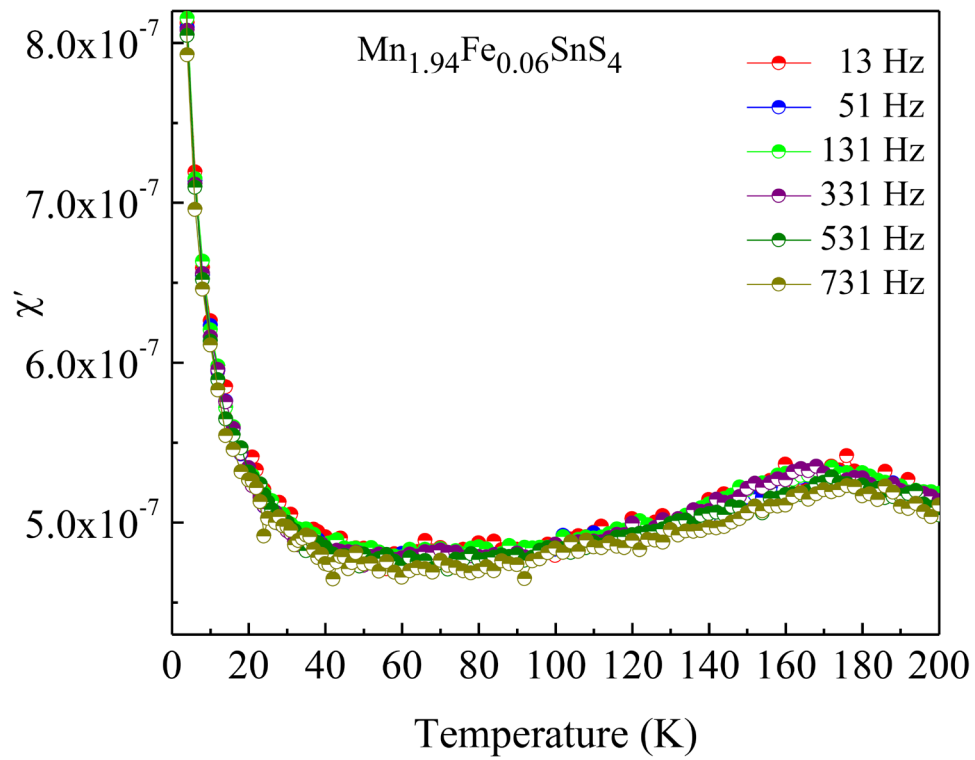

**Figure S6.** AC susceptibility (Real part) plot of  $\text{Mn}_{1.94}\text{Fe}_{0.06}\text{SnS}_4$  measured at different frequencies.
